# Supplementary material
Source: Springer Nature journal article supplement (https://www.springermedizin.de/resource/supplementary/12943_2012_1039_MOESM5_ESM.pdf/9552134)

Low Magnification

High Magnification

Ki67  
IgG<sub>2</sub> 500 μg

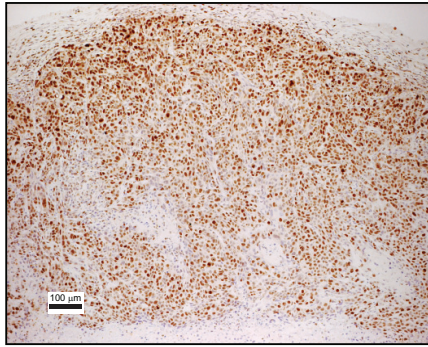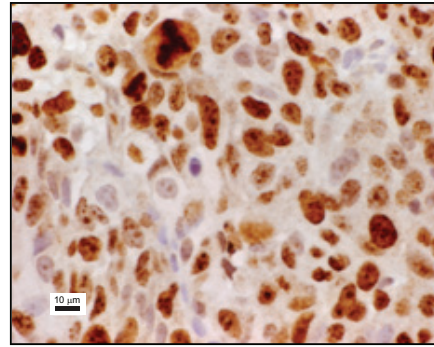

Ki67  
Panitumumab 500 μg

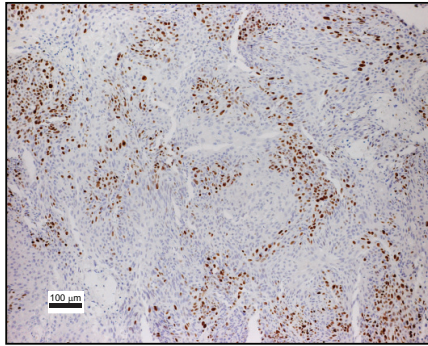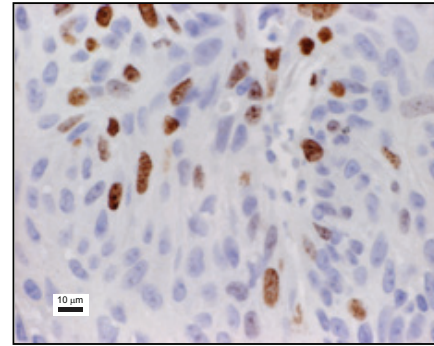

pMAPK  
IgG<sub>2</sub> 500 μg

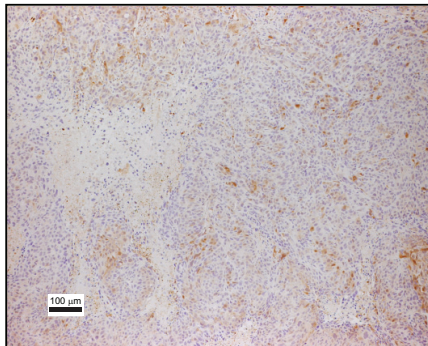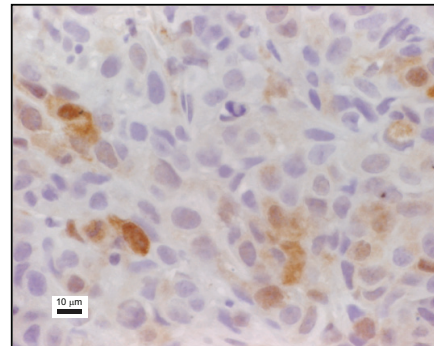

pMAPK  
Panitumumab 500 μg

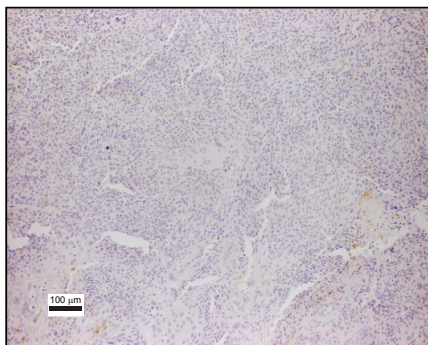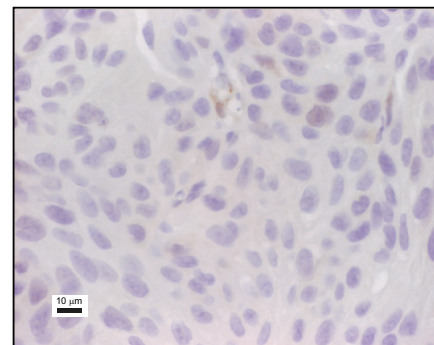

Supplement: MOESM5 [file 9552134]
